# Supplementary material for: Integrative analysis of non-small cell lung cancer patient-derived xenografts identifies distinct proteotypes associated with patient outcomes
Source: PubMed Central journal article supplement (PMC8983714; doi:10.1038/s41467-022-29444-9), 2022-04-05
Supplement: 41467_2022_29444_MOESM1_ESM.pdf [file 41467_2022_29444_MOESM1_ESM.pdf]

# SUPPLEMENTARY INFORMATION

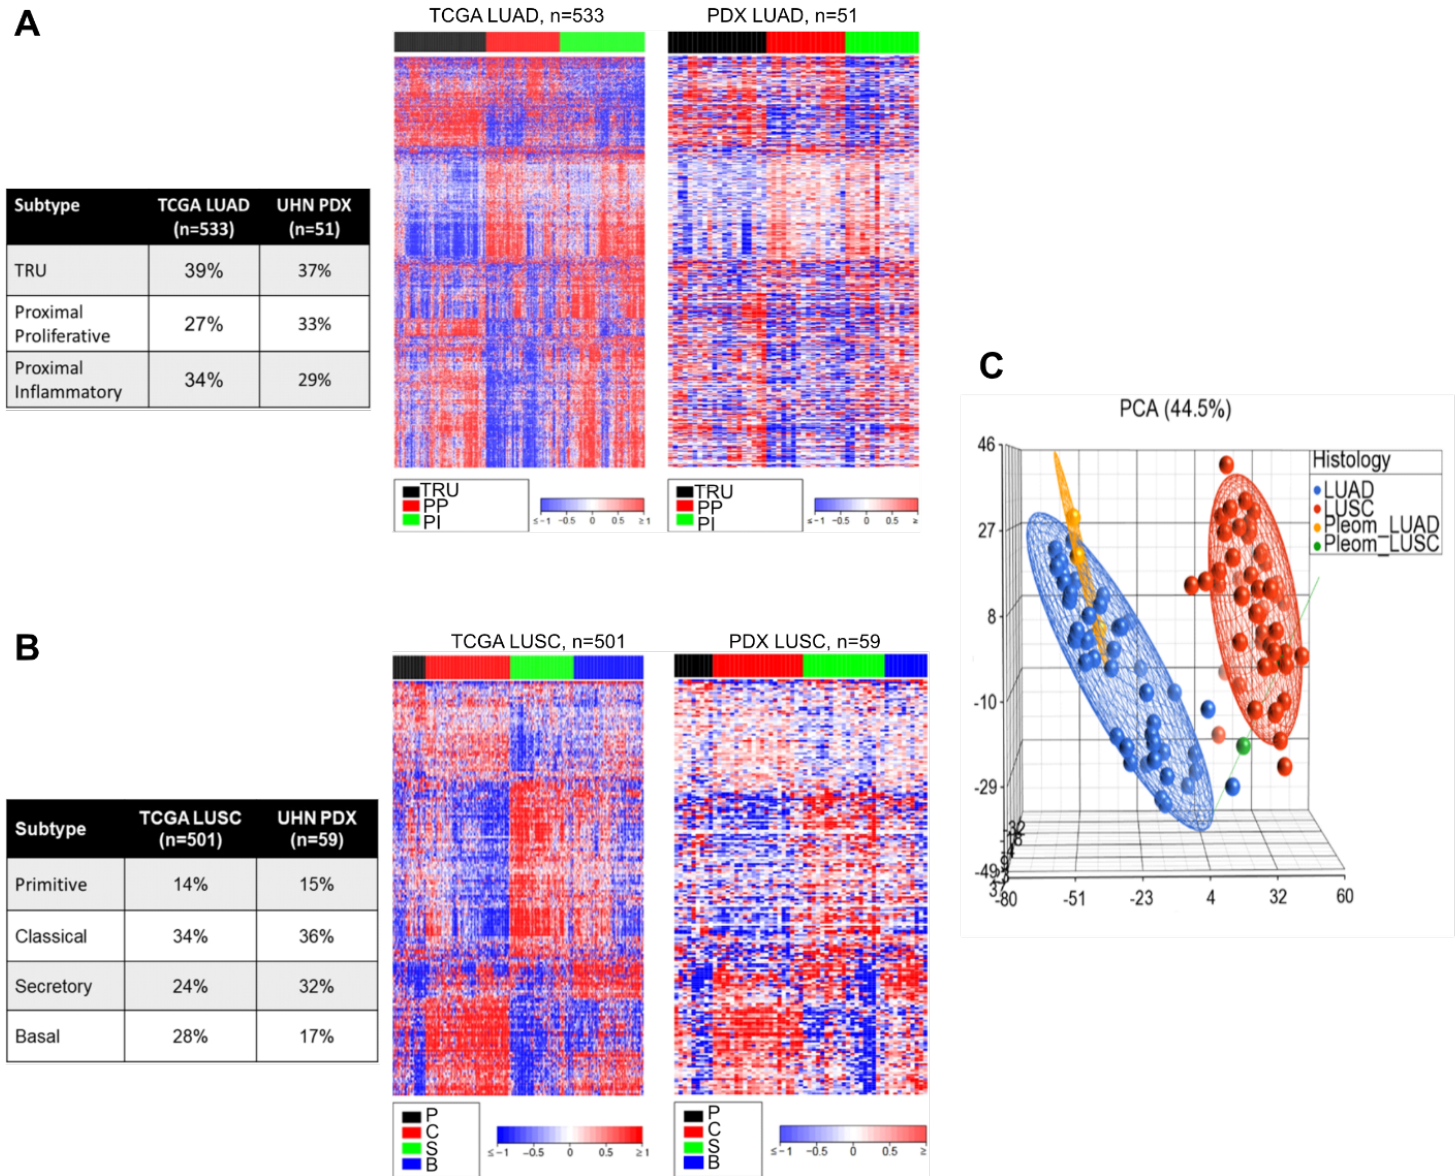

**Supplementary Figure 1-PDX transcriptomic subtype distribution represent primaries and separation of LUAD from LUSC by methylome-A)** Comparison of the distribution of LUAD subtypes between the entire TCGA cohort (<https://portal.gdc.cancer.gov/>) and PDX cohort reported in this manuscript. (TRU=Terminal Respiratory Unit; PP=Proximal Proliferative; PI=Proximal Inflammatory). **B)** Comparison of the distribution of LUSC subtypes between the entire TCGA cohort (<https://portal.gdc.cancer.gov/>) and PDX cohort reported in this manuscript. (P=Primitive; C=Classical; S=secretory; B=Basal). **C)** The 3D PCA plot with ellipses concentration was generated using 4,000 most variable probes, showing distinct separation of the LUAD and LUSC PDX tumor samples.

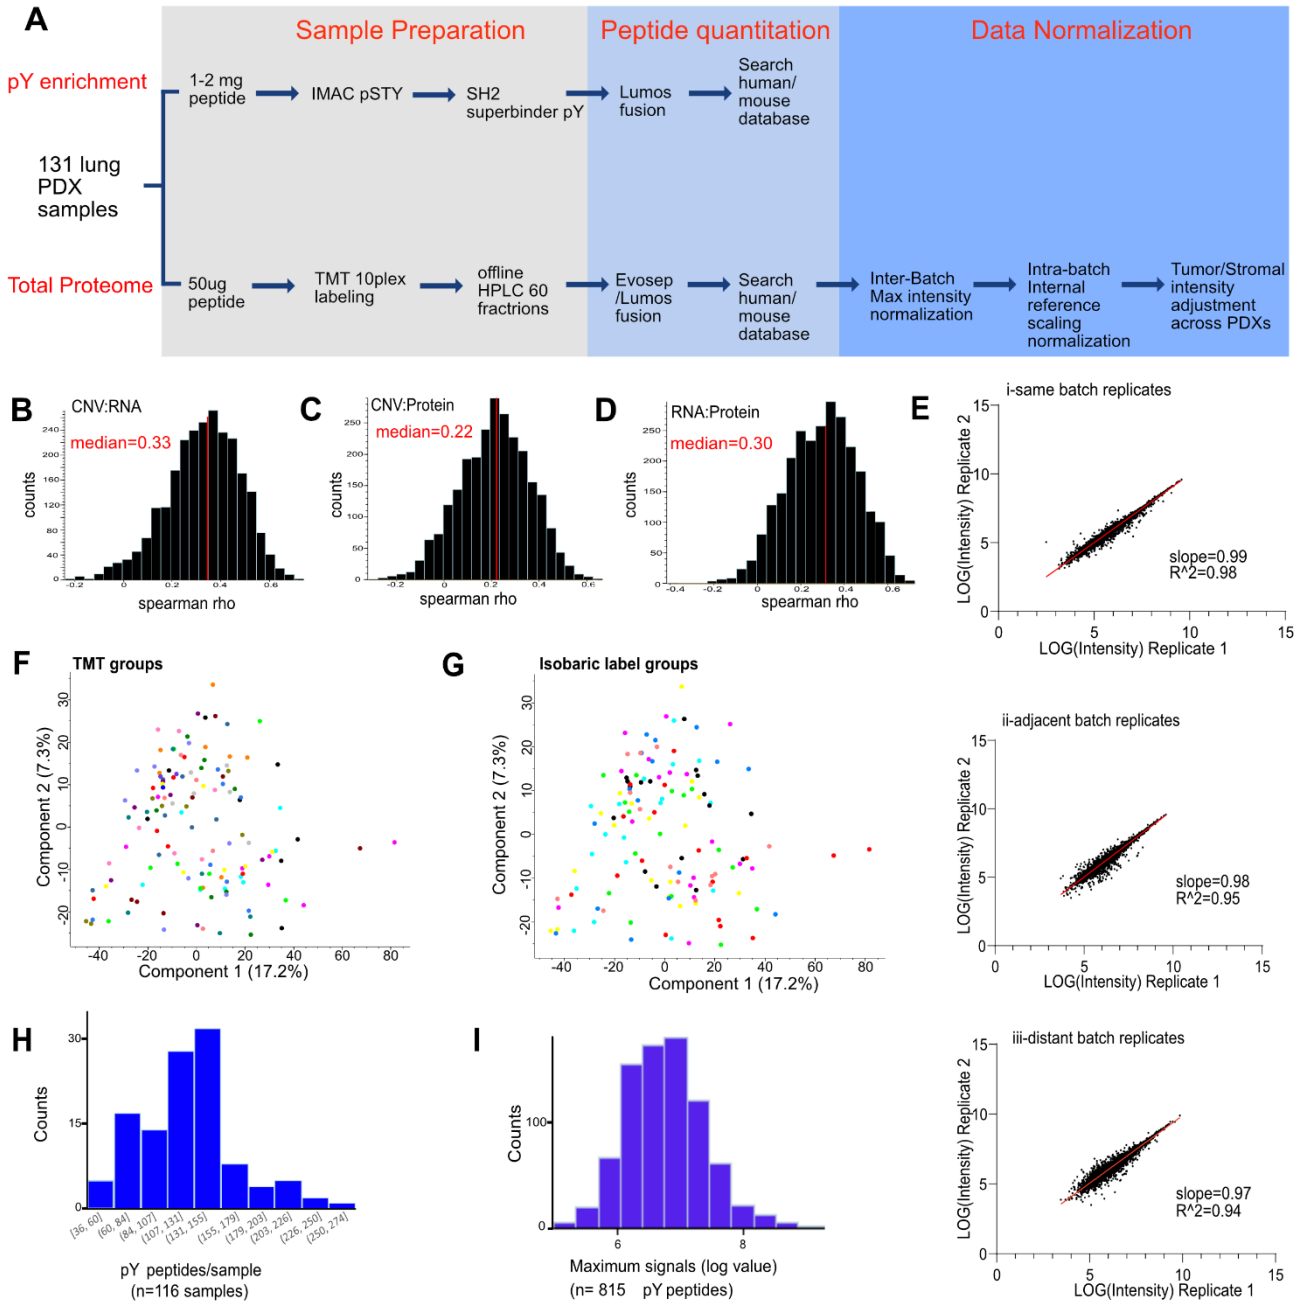

**Supplementary Figure 2-Proteome and pY-proteome workflow, data quality assurance, and correlations across molecules-A)** Proteome and phosphoproteome sample preparation, peptide quantification and data normalization workflow. **B)** CNV-RNA pairwise spearman correlation across all patients shows distribution of spearman rho for all genes identified in all patients at the proteome level with median of 0.33. See also [Supplementary data 1](#). **C)** CNV-Protein pairwise spearman correlation across all patients shows distribution of spearman rho for all genes identified in all patients at the proteome level with median of 0.22. See also [Supplementary data 1](#). **D)** RNA-Protein pairwise spearman correlation across all patients shows distribution of spearman rho for all genes identified in all patients at the proteome level with median of 0.3. See also [Supplementary data 1](#). **E)** linear relationship between technical repeats of the i-same ii-adjacent and iii-distant batch. **F)** PCA analysis of all cases, each color represents a different TMT group. Figure shows no TMT batch affect is seen. **G)** PCA analysis of all cases, each color represents a different isobaric label. Figure shows no isobaric label affect is seen **H)** Distribution of number of pY peptides per sample show almost a normal distribution **I)** Distribution of maximum signals show almost a normal distribution.

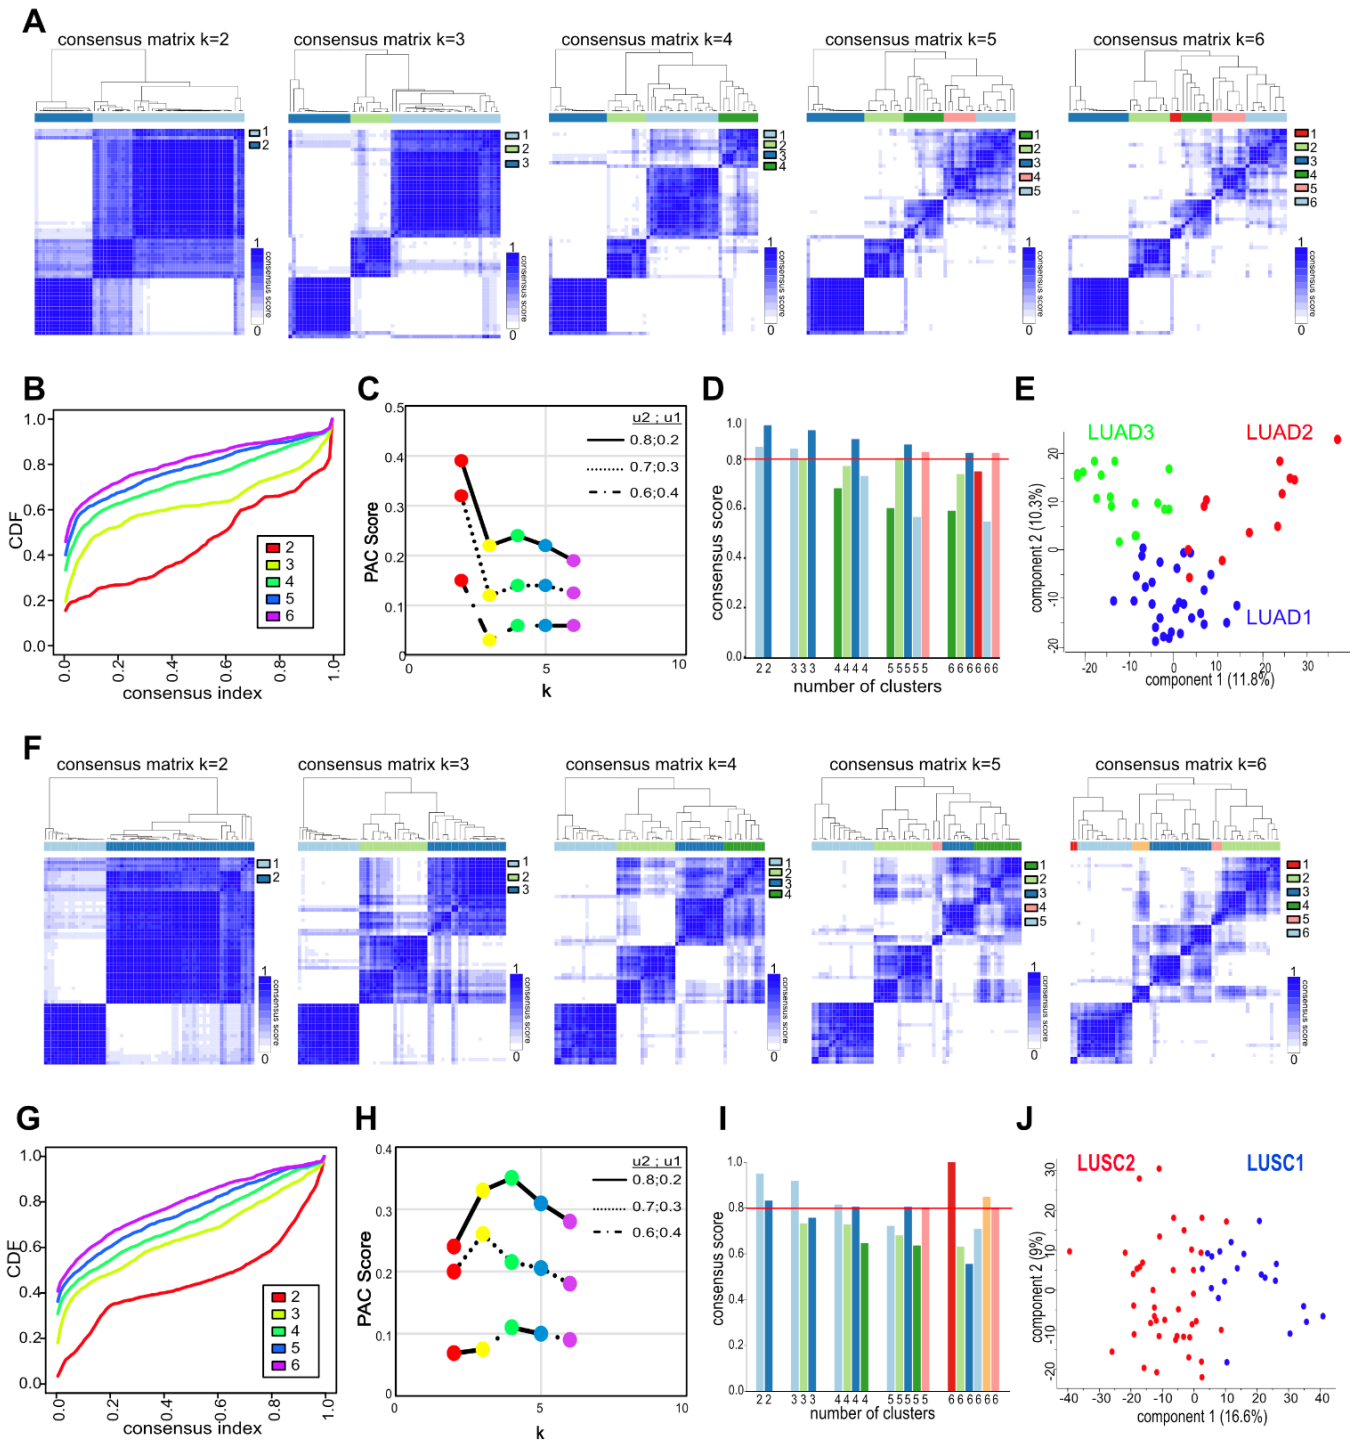

**Supplementary Figure 3- Identification of 3 LUAD and 2 LUSC proteotypes-A)** Heatmap of consensus matrices for k=2-6 for LUAD. **B)** Cumulative density frequency (CDF) plot for K=2-6 for LUAD. **C)** Proportion of ambiguous clustering (PAC) scores for k=2-6 for LUAD show optimal cluster at k=3. **D)** Cluster consensus plot for k=2-6 for LUAD. **E)** PCA of LUAD samples segregated into the 3 identified groups. **F)** Heatmap of consensus matrices for k=2-6 for LUSC. **G)** CDF plot for K=2-6 for LUSC. **H)** PAC scores for k=2-6 for LUSC show optimal cluster at k=2. **I)** Cluster consensus plot at k=2-6 for LUSC. **J)** PCA of LUSC samples segregated into the 2 identified groups.

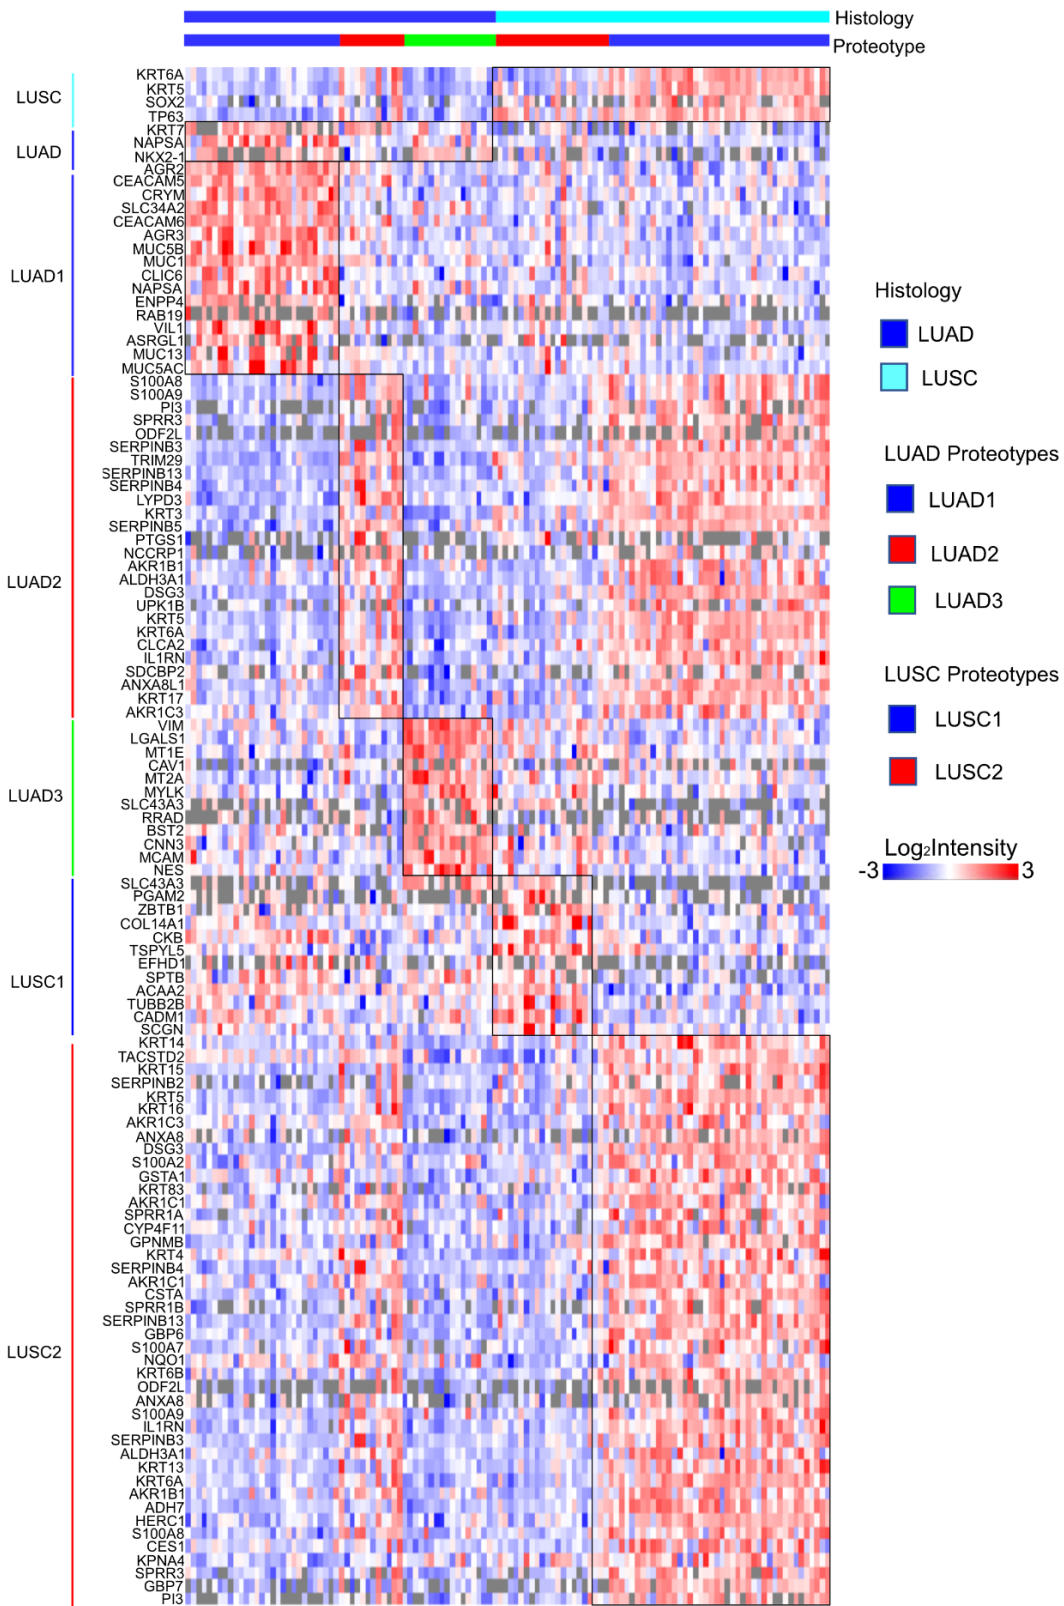

**Supplementary Figure 4-Proteotype markers:** Protein expression of histological subtypes and proteotype markers across PDXs-The proteome expression of biomarkers across PDXs are shown. From the top markers are for: LUSC and LUAD histological subtypes, followed by proteotype markers for LUAD1, LUAD2, LUAD3, LUSC1, and LUSC2.

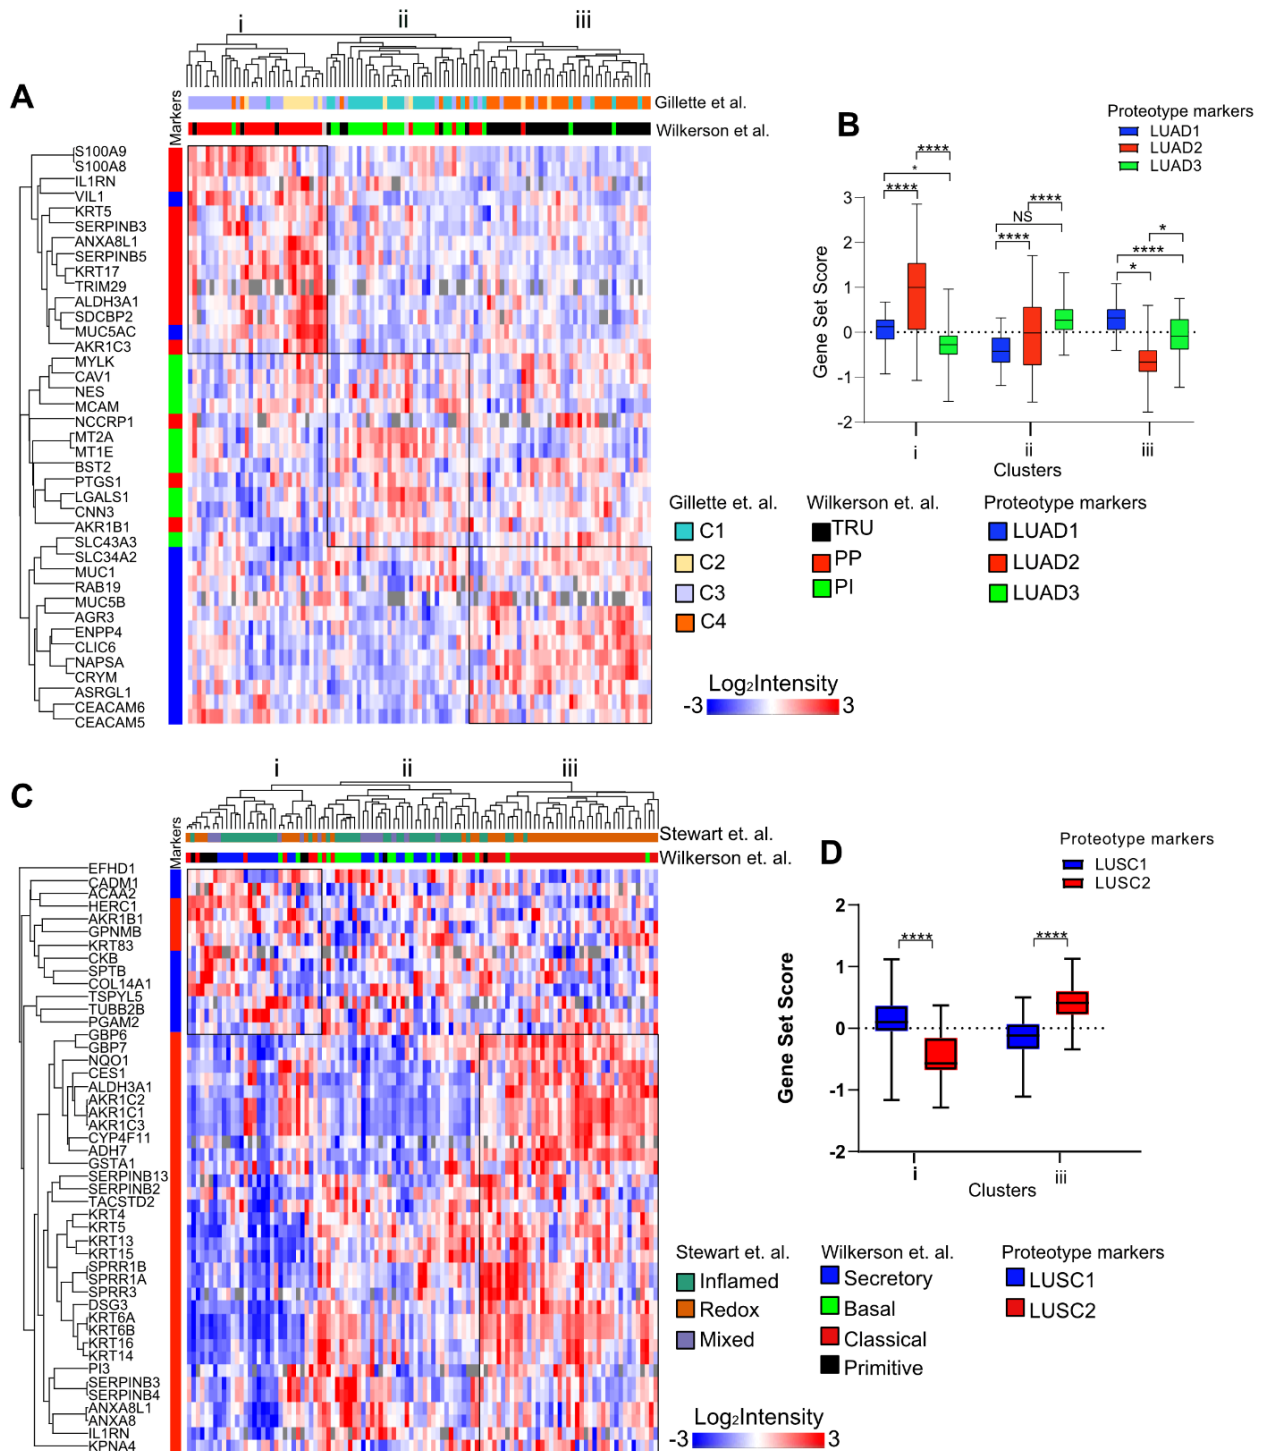

**Supplementary Figure 5-LUAD and LUSC proteotype marker validation in independent primary cohorts-**  
**A)** Unsupervised hierarchical clustering of an unrelated 107 LUAD tumors (Gillette et. al., 2020) with LUAD proteotype markers identified in this study. **B)** The expression of LUAD1, 2 and 3 markers are significantly higher in cluster iii (n=42), i (n=32) and ii (n=33) respectively\* as determined by 2way ANOVA (p-value=4.54E-25). **C)** Unsupervised hierarchical clustering of an unrelated 108 LUSC tumor (Stewart et. al., 2019) with LUSC proteotype markers identified in this study. **D)** The expression of LUSC1 and 2 markers are significantly higher in cluster i (n=30), and iii (n=41) respectively\* as determined by 2way ANOVA (p-value=2.8E-15)

\*One-sided Tukey's adjusted for multiple comparison p-value= \*\*\*\*<0.0001, \*\*<0.005, \*<0.05. Box plots showing median at centre line, whiskers showing minimum and maximum values and box showing the 25-75% percentile.

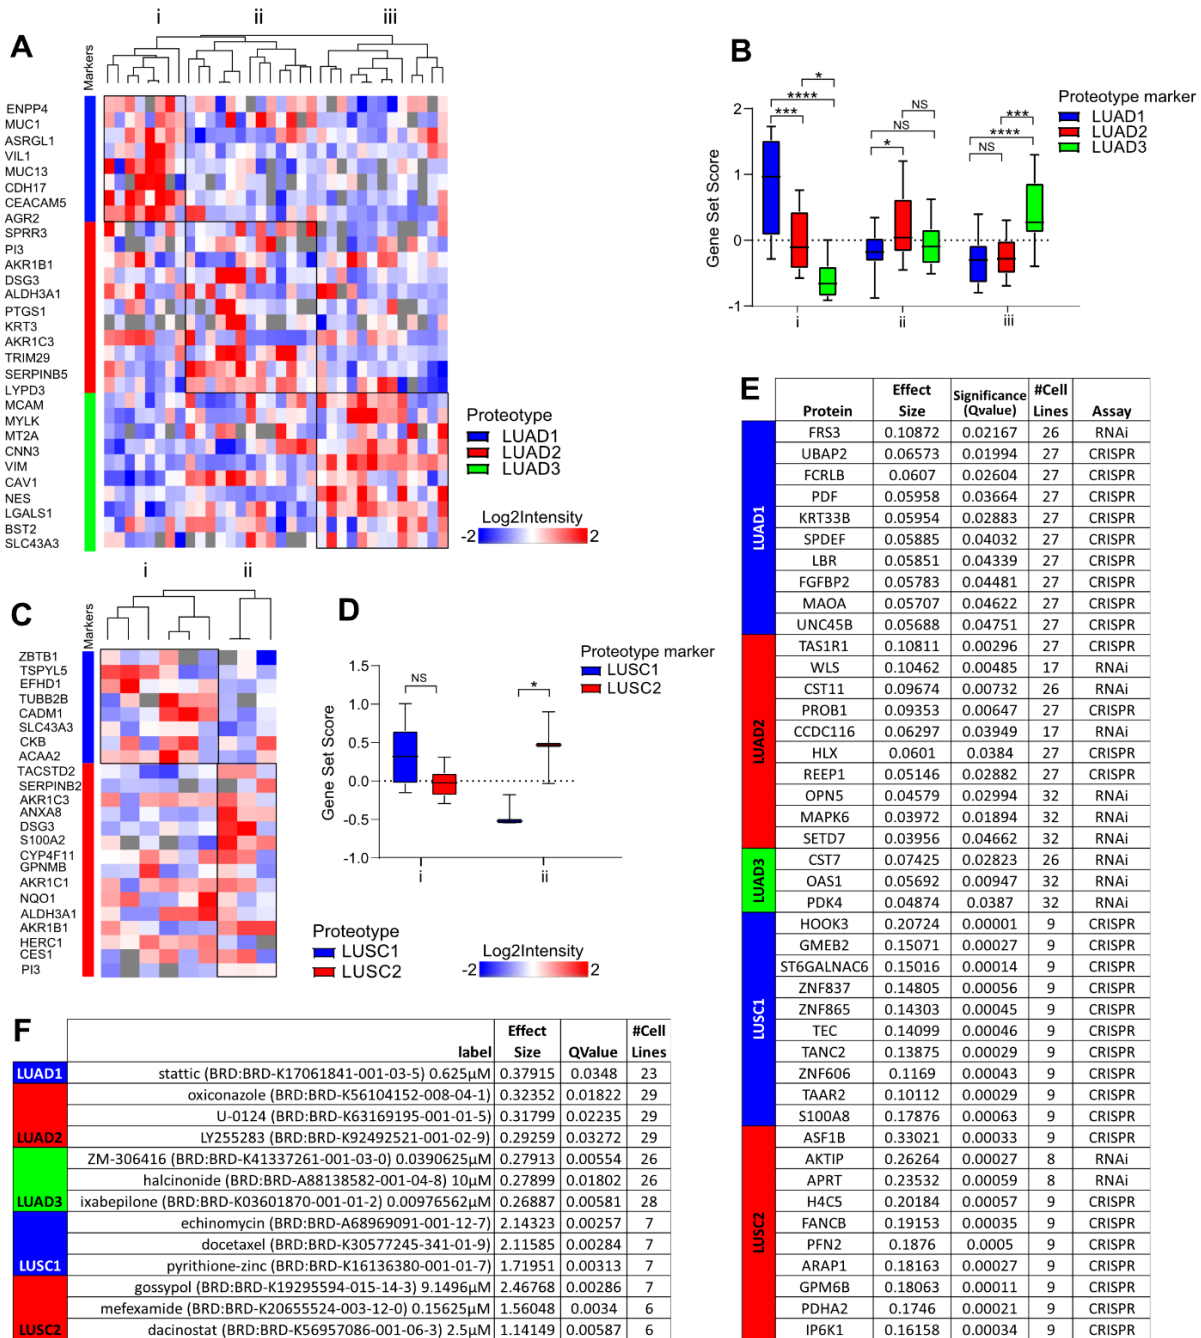

**Supplementary Figure 6-Prototyping DepMap NSCLC cell lines with markers reveals proteotype-specific sensitivities and validate study's target predictions. A)** LUAD markers used to cluster of 34 unrelated LUAD DEPMAP cell lines identifies 3 cluster i, ii, and iii with respectively higher LUAD1,2 and 3 expressions. **B)** The expression of LUAD1, 2 and 3 markers are significantly higher in cluster i (n=8), ii (n=13) and iii (n=13) respectively\* determined by 2way ANOVA (p-value=2.68E-11). **C)** LUSC markers used to cluster 9 unrelated LUSC DEPMAP cell lines identifies 2 cluster i and ii with respectively higher LUSC1 and 2 expressions. **D)** The expression of LUSC1 markers is higher in cluster i (n=6) and LUSC2 markers are significantly higher in cluster ii (n=3) \*determined by 2way ANOVA (p-value=0.0031). **E)** Top 10 sensitivities with the highest difference in effect size on proliferation for each proteotype in DepMap cells. **F)** Top 3 most significant specific drug sensitivities for each proteotype in DepMap cells.

\*One-sided Tukey's adjusted for multiple comparison p-value= \*\*\*\*<0.0001, \*\*<0.005, \*<0.05. Box plots showing median at centre line, whiskers showing minimum and maximum values and box showing the 25-75% percentile.

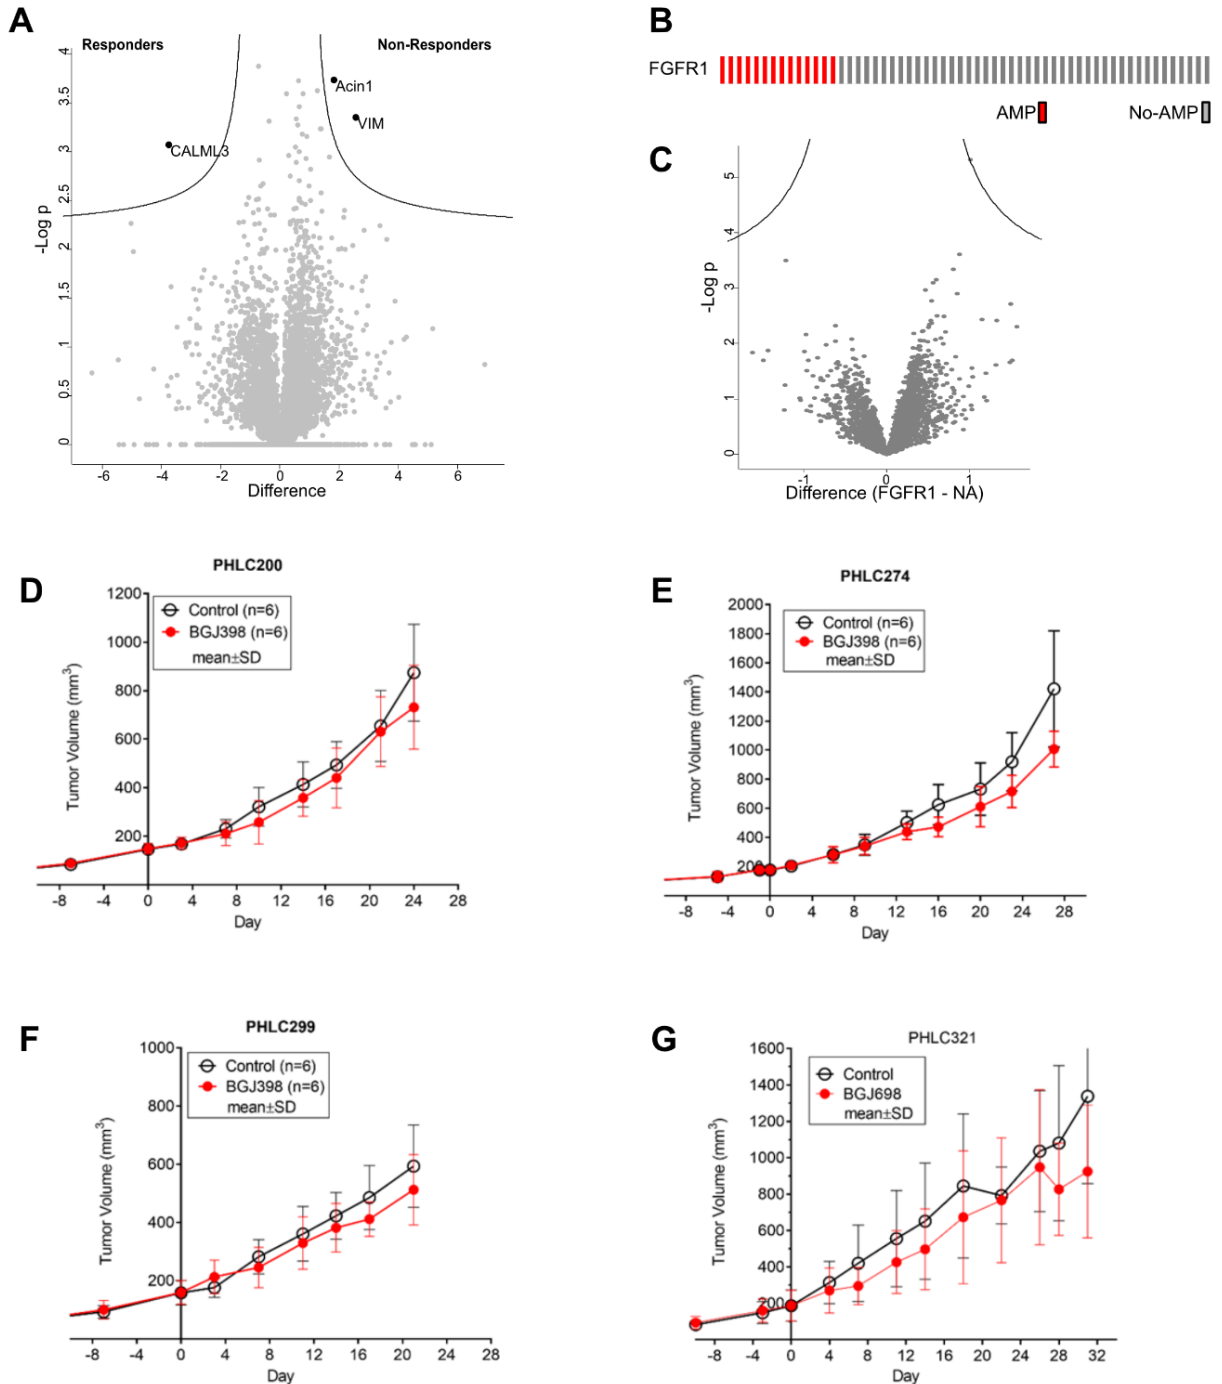

**Supplementary Figure 7-FGFR1 inhibitor, BGJ398 Response curves in FGFR1 amplified PDX models-A)** Proteome differences between EGFR TKI non-responders (PHLC148, -164) vs responders (PHLC137, -192) using a two-sided t-test (FDR<0.05). **B)** Proportion of FGFR1 amplified cases among LUSC is 17 of 58 (29%). **C)** No proteins are significantly different between AMP and no-AMP cases (two-sided t-test, FDR<0.05). **D-G)** FGFR1 inhibitor BGJ398 did not show a significant response compared to control in four FGFR1-amplified PDX models (linear mixed effects models test,  $p > 0.1$ ): **D)** PHLC-200, **E)** PHLC-274, **F)** PHLC-299, and **G)** PHLC-321. All error bars are shown as mean  $\pm$  SD.

**Supplementary Table 1.** Breakdown of patient tumors used for engraftment.

|                                     | <b>Resection</b> | <b>EBUS</b> | <b>Total</b> |
|-------------------------------------|------------------|-------------|--------------|
| NSCLC patients with tumor implanted | 443              | 57          | 500          |
| Non-engraftment                     | 237              | 44          | 281          |
| Formed lymphoma at P0               | 56               | 1           | 57           |
| Engrafted Carcinoma at P0           | 150              | 13          | 163          |
| Unstable engraftment (<P2)          | 25               | 1           | 26           |
| Stable PDX growth (>P2)             | 125              | 12          | 137          |



**Supplementary Table 2. Patient Summary**

|                         |                     |
|-------------------------|---------------------|
| Covariate               | n=137               |
| <b>age at procedure</b> |                     |
| Mean (sd)               | 67.8 (10.3)         |
| Median (Min,Max)        | 67.1<br>(44.1,90.2) |
| <b>sex</b>              |                     |
| M                       | 87 (64)             |
| F                       | 50 (36)             |
| <b>hist</b>             |                     |
| LUSC                    | 65 (47)             |
| LUAD                    | 58 (42)             |
| LCNEC                   | 6 (4)               |
| Pleom LUSC              | 2 (1)               |
| Pleom LAUD              | 3 (2)               |
| LCC                     | 2 (1)               |
| ADSQ                    | 1 (1)               |
| <b>smoking</b>          |                     |
| Ever                    | 123 (91)            |
| Never                   | 12 (9)              |
| Missing                 | <b>2</b>            |
| <b>pathStage</b>        |                     |
| 1                       | 40 (30)             |
| 2                       | 49 (37)             |
| 3                       | 33 (25)             |
| 4                       | 12 (9)              |
| Missing                 | <b>3</b>            |
| <b>adj ch</b>           |                     |
| Y                       | 49 (36)             |
| N                       | 88 (64)             |
| <b>adj rad</b>          |                     |
| Y                       | 17 (12)             |
| N                       | 119 (88)            |
| Missing                 | <b>1</b>            |
| <b>resection</b>        |                     |
| Y                       | 125 (100)           |
| Missing                 | <b>12</b>           |

**Supplementary Table 3.** Proteotypes' associations (Fisher's exact test) with clinical and genomic attributes.

|                       | LUAD1    | LUAD2    | LUAD3    | LUSC1   | LUSC2 |                                                                                                                                            |
|-----------------------|----------|----------|----------|---------|-------|--------------------------------------------------------------------------------------------------------------------------------------------|
| Stage                 | p=0.0177 |          |          |         |       | □ early                                                                                                                                    |
| Smoking Status        |          |          |          |         |       | □ not enriched                                                                                                                             |
| Sex                   |          |          |          |         |       |                                                                                                                                            |
| Transcriptome Subtype |          |          | p=0.009  | p=0.004 |       | <input type="checkbox"/> PI<br><input type="checkbox"/> primitive<br><input type="checkbox"/> intermediate<br><input type="checkbox"/> low |
| Methylome Subtype     |          | p=0.0015 | p=0.0053 |         |       |                                                                                                                                            |

**Supplementary Table 4.** Univariate survival using Cox-proportional hazard model for LUAD and LUSC proteotypes.

| <b>Covariate</b> | <b>HR(95%CI)</b>  | <b>p-value</b> | <b>Global p-value</b> |
|------------------|-------------------|----------------|-----------------------|
| <b>LUAD</b>      |                   |                | 0.1                   |
| LUAD2 vs LUAD1   | 1.28 (0.41, 4.03) | 0.67           |                       |
| LUAD3 vs LUAD1   | 2.6 (1.07, 6.3)   | 0.034          |                       |
| <b>LUSC</b>      |                   |                | 0.049                 |
| LUSC2 vs LUSC1   | 3.48 (1,12.06)    |                |                       |

**Supplementary Table 5.** Multivariate survival with stage using Cox-proportional hazard model for LUAD proteotypes

| Covariate             | HR (95% CI)      | p-value | Global p-value |
|-----------------------|------------------|---------|----------------|
| <b>pathStage12 34</b> |                  |         | 0.034          |
| 1/2                   | reference        |         |                |
| 3/4                   | 2.59 (1.08,6.25) |         |                |
| <b>cluster</b>        |                  |         | 0.5            |
| 1                     | reference        |         |                |
| 2                     | 1.04 (0.32,3.25) | 0.94    |                |
| 3                     | 1.73 (0.66,4.55) | 0.27    |                |

**Supplementary Table 6.** Multivariate survival with stage using Cox-proportional hazard model for LUSC proteotypes

| Covariate             | HR (95% CI)       | p-value | Global p-value |
|-----------------------|-------------------|---------|----------------|
| <b>pathStage12 34</b> |                   |         | 0.074          |
| 1/2                   | reference         |         |                |
| 3/4                   | 2.55 (0.91, 7.15) |         |                |
| <b>cluster</b>        |                   |         | 0.079          |
| 1                     | reference         |         |                |
| 2                     | 2.71 (0.74, 9.87) |         |                |

**Supplementary Table 7.** Validation cluster associations (Fisher's exact test) with original study's subtypes.

|          |           | iii/LUAD1 | i/LUAD2   | ii/LUAD3  |
|----------|-----------|-----------|-----------|-----------|
| Gillette | <b>C1</b> |           |           | p=4.9E-07 |
|          | <b>C2</b> |           | p=2.9E-06 |           |
|          | <b>C3</b> |           |           |           |
|          | <b>C4</b> | p=5.7E-08 |           |           |

not enriched

|         |                 | i/lusc1  | iii/lusc2 |
|---------|-----------------|----------|-----------|
| Stewart | <b>inflamed</b> | p=0.0009 |           |
|         | <b>Redox</b>    |          | p=2.5E-11 |

not enriched
