# Supplementary material for: Integrative analysis of non-small cell lung cancer patient-derived xenografts identifies distinct proteotypes associated with patient outcomes
Source: PubMed Central journal article supplement (PMC8983714; doi:10.1038/s41467-022-29444-9), 2022-04-05
Supplement: 41467_2022_29444_MOESM3_ESM.pdf [file 41467_2022_29444_MOESM3_ESM.pdf]

### **Description of Additional Supplementary Files**

File Name: Supplementary Data 1

Description: Clinical information, Omic-data, and cross platform correlations

File Name: Supplementary Data 2

Description: -Differential Proteome and pathways

File Name: Supplementary Data 3

Description: Differential pY and pathways

File Name: Supplementary Data 4

Description: DepMap proteotyping and sensitivities
